# Supplementary material
Source: ML conference proceedings conference paper supplement (https://openaccess.thecvf.com/content/ICCV2021/html/Wang_Adaptive_Focus_for_ICCV_2021_paper.html)
Supplement: Supplementary file 1 [file Wang_Adaptive_Focus_for_ICCV_2021_supplemental.pdf]

# Appendix for “Adaptive Focus for Efficient Video Recognition”

## A. Introduction of Baselines

AdaFocus is compared with several competitive baselines that focus on facilitating efficient video recognition, including MultiAgent [9], SCSampler [4], LiteEval [11], AdaFrame [10], Listen-to-look [1] and AR-Net [6].

- MultiAgent [9] proposes to learn to select important frames with multi-agent reinforcement learning.
- SCSampler [4] introduces a light-weighted framework to efficiently identify the most salient temporal clips within a long video. We follow the implementation of [6].
- LiteEval [11] combines a coarse LSTM and a fine LSTM to adaptively allocate computation based on the importance of frames.
- AdaFrame [10] learns to dynamically select informative frames with reinforcement learning and performs adaptive inference.
- Listen-to-look [1] fuses image and audio information to select the key clips within a video. As we do not leverage the audio of videos, for a fair comparison, we adopt its image-based version introduced in their paper.
- AR-Net [6] dynamically identifies the importance of video frames, and processes them with different resolutions accordingly.

## B. Implementation Details

### B.1. Training Hyper-parameters for Section 4.1

In our implementation, we always train  $f_G$ ,  $f_L$  and  $f_C$  using a SGD optimizer with cosine learning rate annealing and a Nesterov momentum of 0.9. The size of the mini-batch is set to 64, while the L2 regularization coefficient is set to  $1e-4$ . We initialize  $f_G$  and  $f_L$  by fine-tuning the ImageNet pre-trained MobileNet-V2 [7] and ResNet-50 [2]<sup>1</sup> using full inputs for 15 epochs with an initial learning rate of 0.01. In stage I, we train  $f_L$  and  $f_C$  using randomly sampled patches for 50 epochs with an initial learning rate of

<sup>1</sup>We use the official models provided by PyTorch.

$5e-4$  and 0.05, respectively. Here we do not train  $f_G$  as we find this does not significantly improve the performance, but increases the training time. In stage II, we train  $\pi/\pi'$  with an Adam optimizer [3] for 50/10 epochs. The same training hyper-parameters as [8] are adopted. In stage III, we only fine-tune  $f_C$  with the learned policy for 10 epochs, since we find further fine-tuning  $f_L$  leads to trivial improvements but prolongs the training time. The initial learning rates are set to  $5e-4$  and  $5e-3$  for Mini-Kinetics and ActivityNet/FCVID, respectively.

### B.2. Training Hyper-parameters for Section 4.2

Here we initialize  $f_G$  and  $f_L$  by training them using the same configuration as [5]. The training procedure of AdaFocus is the same as Section 4.1 except for the following changes. In stage I, we use the initial learning rate of  $1e-5$  and 0.01 for  $f_L$  and  $f_C$ , respectively, and train them for 10 epochs. In stage III, we use an initial learning rate of  $5e-4$  for  $f_C$ . Note that TSM+ follows exactly the same training procedure as our method. The only difference is that TSM+ does not train the policy network  $\pi$ , since it adopts full frames as inputs.

## References

- [1] Ruohan Gao, Tae-Hyun Oh, Kristen Grauman, and Lorenzo Torresani. Listen to look: Action recognition by previewing audio. In *CVPR*, pages 10457–10467, 2020. 1
- [2] Kaiming He, Xiangyu Zhang, Shaoqing Ren, and Jian Sun. Deep residual learning for image recognition. In *CVPR*, pages 770–778, 2016. 1
- [3] Diederik P Kingma and Jimmy Ba. Adam: A method for stochastic optimization. *arXiv preprint arXiv:1412.6980*, 2014. 1
- [4] Bruno Korbar, Du Tran, and Lorenzo Torresani. SCSampler: Sampling salient clips from video for efficient action recognition. In *ICCV*, pages 6232–6242, 2019. 1
- [5] Ji Lin, Chuang Gan, and Song Han. Tsm: Temporal shift module for efficient video understanding. In *ICCV*, pages 7083–7093, 2019. 1
- [6] Yue Meng, Chung-Ching Lin, Rameswar Panda, Prasanna Sattigeri, Leonid Karlinsky, Aude Oliva, Kate Saenko, and Rogerio Feris. Ar-net: Adaptive frame resolution for efficient action recognition. In *ECCV*, pages 86–104. Springer, 2020. 1

- [7] Mark Sandler, Andrew Howard, Menglong Zhu, Andrey Zhmoginov, and Liang-Chieh Chen. Mobilenetv2: Inverted residuals and linear bottlenecks. In *CVPR*, pages 4510–4520, 2018. [1](#)
- [8] Yulin Wang, Kangchen Lv, Rui Huang, Shiji Song, Le Yang, and Gao Huang. Glance and focus: a dynamic approach to reducing spatial redundancy in image classification. In *NeurIPS*, 2020. [1](#)
- [9] Wenhao Wu, Dongliang He, Xiao Tan, Shifeng Chen, and Shilei Wen. Multi-agent reinforcement learning based frame sampling for effective untrimmed video recognition. In *ICCV*, pages 6222–6231, 2019a. [1](#)
- [10] Zuxuan Wu, Hengduo Li, Caiming Xiong, Yu-Gang Jiang, and Larry Steven Davis. A dynamic frame selection framework for fast video recognition. *IEEE Transactions on Pattern Analysis and Machine Intelligence*, 2020b. [1](#)
- [11] Zuxuan Wu, Caiming Xiong, Yu-Gang Jiang, and Larry S Davis. Liteeval: A coarse-to-fine framework for resource efficient video recognition. In *NeurIPS*, 2019b. [1](#)
